# Supplementary material
Source: ML conference proceedings conference paper supplement (https://proceedings.neurips.cc/paper_files/paper/2019/hash/3aaa3db6a8983226601cac5dde15a26b-Abstract.html)
Supplement: Supplementary file [file 3aaa3db6a8983226601cac5dde15a26b-Supplemental.zip]

# Appendix

## 1 Searched transformation strategies

We display the channels of each block in the transformed network architecture.

Table 1: Setting of searched ResNet-50(G=16) transformation.

| Layer Name | Groups | (1,1) | (2,2) | (3,3) | (4,4) | (5,5) | (1,3) | (3,1) | (1,5) | (5,1) |
|------------|--------|-------|-------|-------|-------|-------|-------|-------|-------|-------|
| 3-1        | 16     | 32    | 32    | 0     | -     | -     | 56    | 8     | -     | -     |
| 3-2        | 16     | 32    | 32    | 32    | -     | -     | 8     | 24    | -     | -     |
| 3-3        | 16     | 88    | 24    | 16    | -     | -     | 0     | 0     | -     | -     |
| 3-4        | 16     | 64    | 16    | 16    | -     | -     | 24    | 8     | -     | -     |
| 4-1        | 16     | 64    | 48    | 48    | -     | -     | 32    | 64    | -     | -     |
| 4-2        | 16     | 64    | 16    | 112   | -     | -     | 16    | 48    | -     | -     |
| 4-3        | 16     | 48    | 16    | 64    | -     | -     | 96    | 32    | -     | -     |
| 4-4        | 16     | 80    | 0     | 16    | -     | -     | 80    | 80    | -     | -     |
| 4-5        | 16     | 64    | 32    | 48    | -     | -     | 32    | 80    | -     | -     |
| 4-6        | 16     | 64    | 112   | 16    | -     | -     | 32    | 32    | -     | -     |
| 5-1        | 16     | 96    | 96    | 64    | 64    | 0     | 0     | 0     | 32    | 160   |
| 5-2        | 16     | 64    | 128   | 32    | 0     | 96    | 0     | 64    | 96    | 32    |
| 5-3        | 16     | 128   | 32    | 32    | 96    | 32    | 96    | 64    | 32    | 0     |

## 2 Other evidence

The training and evaluation log of different type of detectors are provided, which are *fcnn-nats-r50.log*, *mask-rcnn-nats-r50.log*, *cascade-rcnn-nats-r50.log* and *retina-nats-r50.log*. Training setting, loss of each iteration, training time and inference time are included in log.

The log *fcnn-baseline-eval.log* is provided to prove that our transformation does not influence inference time at all.
